# Supplementary material
Source: PubMed Central journal article supplement (PMC4261610)
Supplement: NIHMS61384-supplement-01.pdf [file NIHMS61384-supplement-01.pdf]

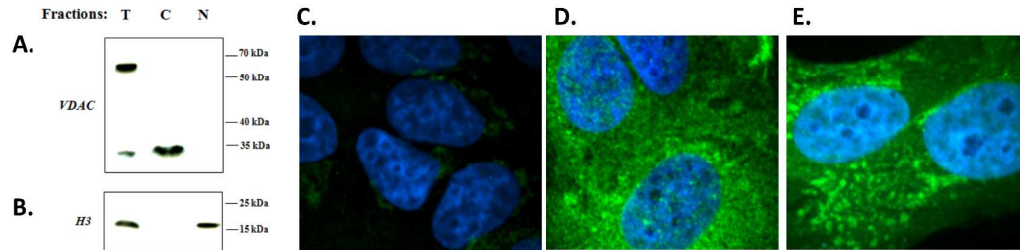

**Supplementary Figure: Protein redistribution results obtained by proteomics analysis of subcellular fractions were validated by western blot and immunofluorescence.**

Western blots of VDAC (panel A) and H3 (panel B) proteins were carried out for total lysates, cytoplasm and nuclear fractions. Immunofluorescent staining of MCF-7 cells was done by use of the PARK-7 primary antibody and goat anti-rabbit IgG H&L (DyLight 488) as the secondary antibody, prior (D) and following E2-treatment (E). Nuclei were visualised with 1.43  $\mu$ M DAPI. The negative control (C) was incubated with the secondary antibody only.
